# Supplementary material
Source: Springer Nature journal article supplement (https://www.springermedizin.de/resource/supplementary/12877_2010_327_MOESM1_ESM.pdf/9439394)
Supplement: MOESM1 [file 9439394]

[Logout](#) - [New Resident](#) - [Print](#)

Doctor: J. SMITH Date: November 16, 2009  
 Resident: JANE DOE Facility: Demonstration  
 Indication: Atrial Fibrillation Recommended INR: 2.0 - 3.0

NOTE: "Mechanical Valve": This program does NOT adjust for this indication.  
 Please contact the Physician for orders.

"Administered" DAILY dose of warfarin for the past week:

|        |        |        |        |        |        |        |
|--------|--------|--------|--------|--------|--------|--------|
| Day 1  | Day 2  | Day 3  | Day 4  | Day 5  | Day 6  | Day 7  |
| 1.0 mg | 2.0 mg | 1.0 mg | 2.0 mg | 1.0 mg | 2.0 mg | 1.0 mg |

Total "weekly" warfarin administered: 10.0 mg **Current INR Value: 1.7**  
 Previous INR Value: 2.5  
 Date of Previous INR: 11/09

Is resident receiving an ANTIBIOTIC? No

**Algorithms suggest dose of 13.0 mg per week:**

Directions: 2mg daily except on Sat give 1mg

| Sunday | Monday | Tuesday | Wednesday | Thursday | Friday | Saturday |
|--------|--------|---------|-----------|----------|--------|----------|
| 2.0    | 2.0    | 2.0     | 2.0       | 2.0      | 2.0    | 1.0      |

Repeat INR in 7 days or \_\_\_\_\_

**SPECIALIZED DOSING**

Dosing ordered: \_\_\_\_\_  
 \_\_\_\_\_

Repeat INR in \_\_\_\_\_ days or \_\_\_\_\_

I authorize the above order: \_\_\_\_\_  
Physician Signature Date

**TELEPHONE AUTHORIZATION**

From: Dr. \_\_\_\_\_  
Name of Physician

Telephone Order Received by: \_\_\_\_\_  
Nurse Signature Date

**NURSE: PLEASE FAX TO PHARMACY WHEN FORM IS COMPLETED AND SIGNED**
